# Supplementary material
Source: PubMed Central journal article supplement (PMC3118632)
Supplement: supp_00204.2010_Figure_Legend_Figure_4.pdf [file supp_00204.2010_Figure_Legend_Figure_4.pdf]

## Figure Legend

- **Revised legend for Figure 4:**

**RGC-32 physically interacts with Smad3 in HPTCs.** (A) RGC-32 colocalization with Smad3 in the nuclei of HPTCs. Cells were treated with vehicle or TGF- $\beta$  (5 ng/ml) for 24 hr. Dual immunostaining was performed using Smad2 (A, green), Smad3 (B, green), and RGC-32 (red) antibodies. Images were captured using confocal microscopy. RGC-32 and Smad3 colocalization (yellow dots) was observed in cells with vehicle-treatment, TGF- $\beta$  enhanced the colocalization. (C) RGC-32 physically interacts with Smad3 in HPTCs. HPTCs were treated with vehicle or TGF- $\beta$  for 24 hours, Co-IP was performed. Control IgG, Smad2, Smad3 and Smad4 antibodies were used for immunoprecipitation; RGC-32 antibody was used for immunoblotting. Only Smad3 physically interacted with RGC-32 in HPTCs, TGF- $\beta$  enhanced the interaction. Boxes around the input blots for Smad2, Smad3, Smad4 and RGC-32 note that samples were run on the same gel but in non-adjacent lanes.
