# Supplementary material
Source: PubMed Central journal article supplement (PMC3118632)

Fig 4

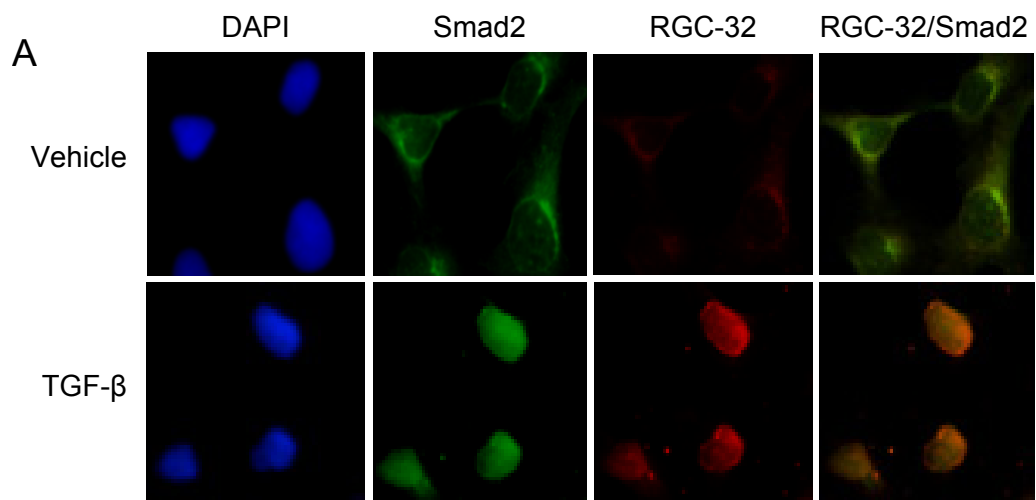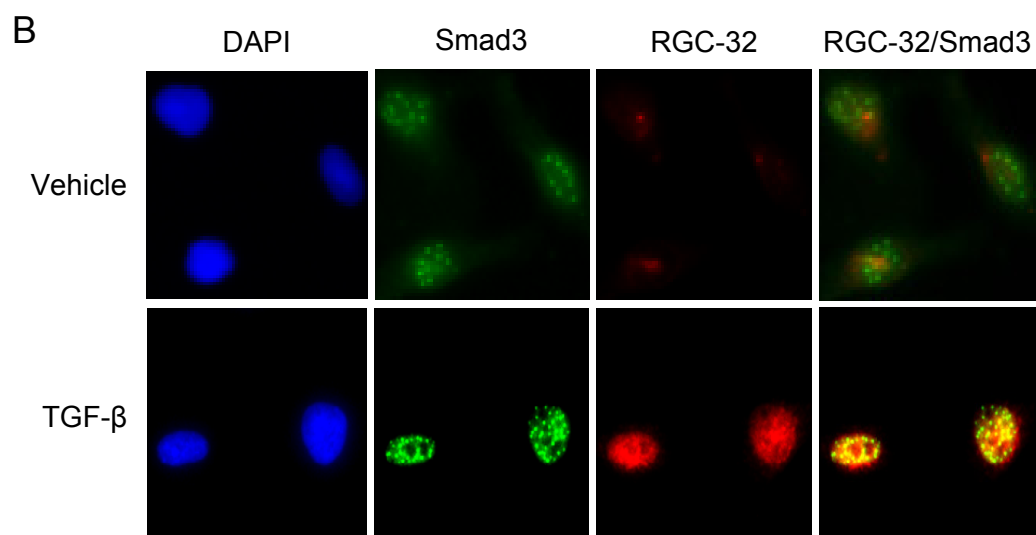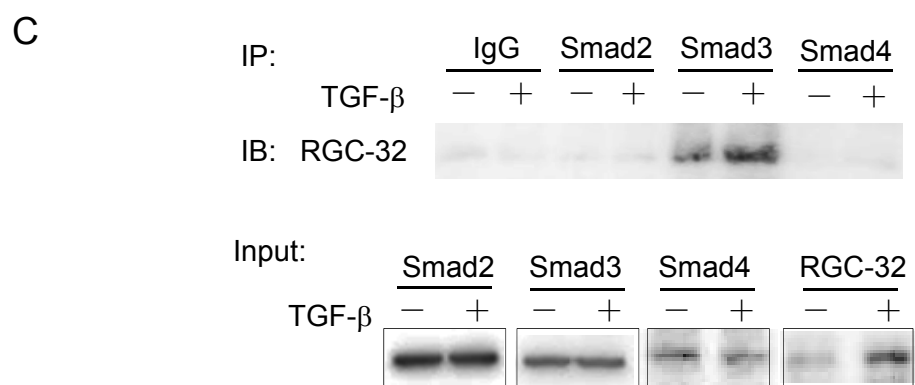

Supplement: supp_00204.2010_Fig_4-new.pdf [file supp_00204.2010_Fig_4-new.pdf]
